# Supplementary material for: Diagnostic Value of Conventional PET Parameters and Radiomic Features Extracted from 18F-FDG-PET/CT for Histologic Subtype Classification and Characterization of Lung Neuroendocrine Neoplasms
Source: PubMed Central journal article supplement (PMC8001140; doi:10.3390/biomedicines9030281), 2021-03-10
Supplement: biomedicines-09-00281-s001.pdf [file biomedicines-09-00281-s001.pdf]

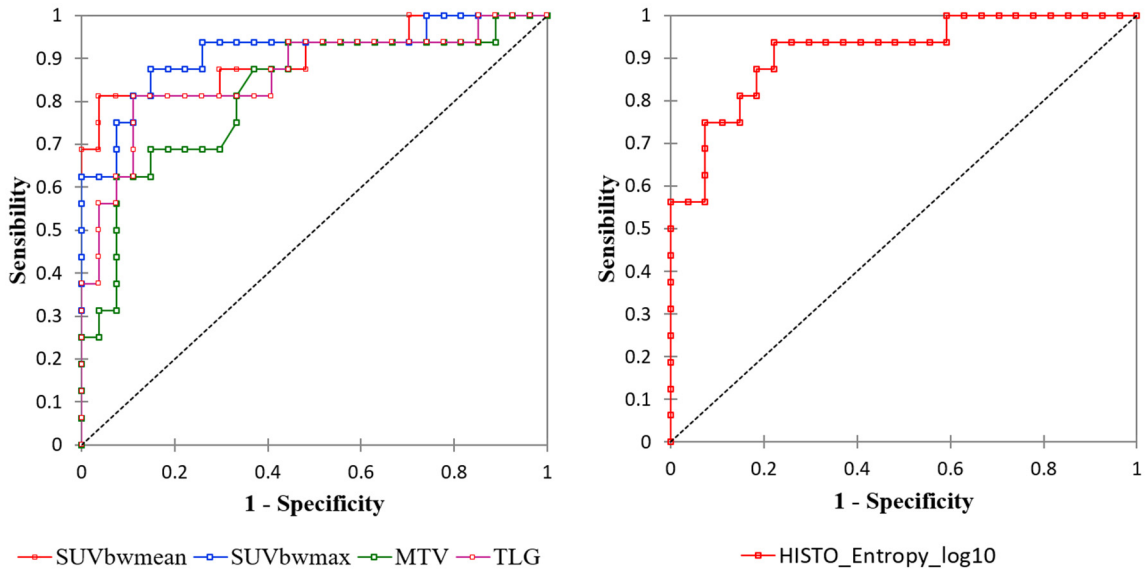

**Supplementary Figure S1.** ROC curve analysis of the conventional and volumetric PET parameters (left) and Histo\_Entropy\_log10 (right) excluding the 3 patients with small-cell lung cancer (SCLC).

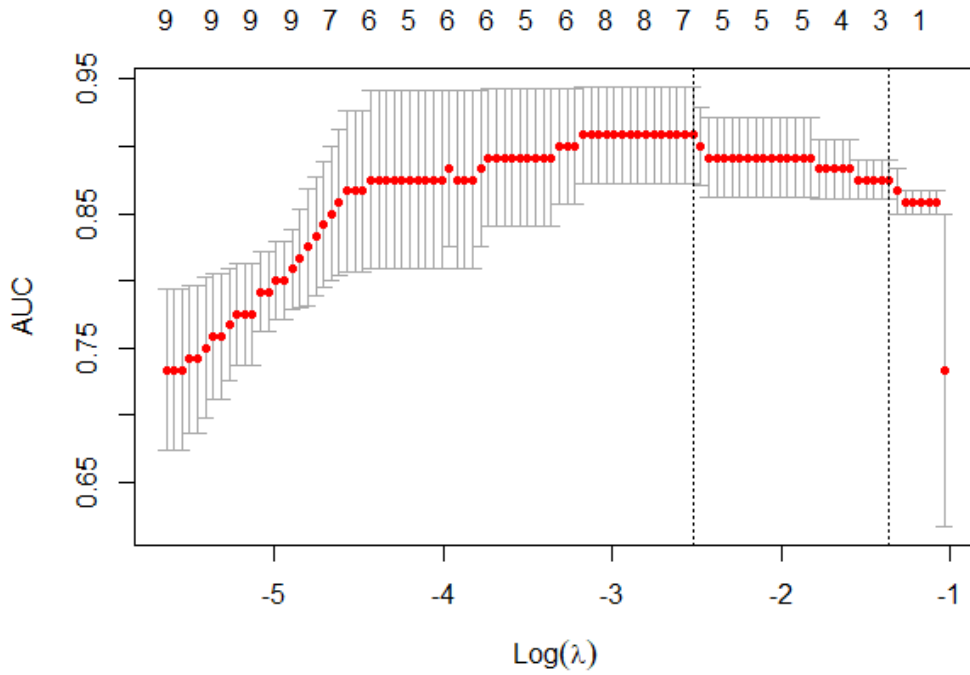

**Supplementary Figure S2.** Radiomics features selection using LASSO in the population excluding the 3 patients with SCLC.
